# Supplementary material
Source: MDPI journal article supplement (https://www.mdpi.com/2071-1050/9/8/1446)
Supplement: s1 [file s1]

**Table S1.** Standard reception strategies.

| Strategy                                                  |                                                                                                              |                                                         | Drivers                                                                            | Constraints                                                                                                                                                                                                     | Country                                                                                                                                                                                                                                                    |
|-----------------------------------------------------------|--------------------------------------------------------------------------------------------------------------|---------------------------------------------------------|------------------------------------------------------------------------------------|-----------------------------------------------------------------------------------------------------------------------------------------------------------------------------------------------------------------|------------------------------------------------------------------------------------------------------------------------------------------------------------------------------------------------------------------------------------------------------------|
| Restrictive conditions for access to reception facilities | Preconditions                                                                                                | Lack of sufficient means for their subsistence          | Some applicants may have financial resources upon arrival                          | Most applicants are destitute and dependent on state support                                                                                                                                                    | Austria, Belgium, Italy, Luxembourg, Netherlands, Portugal, Spain, United Kingdom                                                                                                                                                                          |
|                                                           | Reduction or withdraw                                                                                        | Support from friends and/or relatives                   | Independence                                                                       | The Recast Directive introduces a new requirement that withdrawal may “only occur” in exceptional and duly justified case, ensuring access to health care and a dignified standard of living for all applicants | Luxembourg                                                                                                                                                                                                                                                 |
|                                                           |                                                                                                              | Violation of internal rules                             | Availability of unoccupied places                                                  |                                                                                                                                                                                                                 | (Austria, Belgium10, France, Greece, Ireland, Italy, Luxembourg, Netherlands, Poland, Portugal)                                                                                                                                                            |
|                                                           |                                                                                                              | Absence from facilities                                 |                                                                                    |                                                                                                                                                                                                                 | Austria, Belgium, Finland, France, Greece, Italy, Luxembourg, Poland, Spain                                                                                                                                                                                |
| Allocation                                                | Dispersal system burden-sharing concept, between State regions or provinces encouraging long-term settlement | Proportional quota (province population/tax revenue)    | Ensure an even spread financial and social costs                                   | Reception capacity, the needs and profile of the applicant as well as the status of application must be keep in mind                                                                                            | Austria and Germany                                                                                                                                                                                                                                        |
|                                                           |                                                                                                              | Monitored proportion (applicants/area total population) | Prevent ‘overburdening’ of public services                                         |                                                                                                                                                                                                                 | Ireland                                                                                                                                                                                                                                                    |
|                                                           |                                                                                                              | Available space, resources, cultural fit, social risk   | Provide best integration options                                                   |                                                                                                                                                                                                                 | Italy, Portugal and the United Kingdom                                                                                                                                                                                                                     |
|                                                           |                                                                                                              | Agreement between government and municipalities         | Compensations                                                                      |                                                                                                                                                                                                                 | Finland                                                                                                                                                                                                                                                    |
|                                                           |                                                                                                              | The applicant decides where to reside                   | Freedom to choose                                                                  |                                                                                                                                                                                                                 | France (monitored) and Sweden (on his/her own)                                                                                                                                                                                                             |
|                                                           | Stages of the procedure                                                                                      | Initial/transit facilities and follow-up accommodation  | Better adaptation process                                                          | Applicants first received in initial/transit facilities can be obliged to stay there (Germany)                                                                                                                  | Austria, Belgium, Czech Republic, Finland, France, Germany, Ireland, Italy, Luxembourg, Netherlands, Poland, Portugal, Slovak Republic, Spain, Sweden, and Norway                                                                                          |
|                                                           |                                                                                                              | Applicants are admitted to the asylum system first      | if they claim to be destitute, they are moved to the initial transit accommodation | Without a period of adaptation                                                                                                                                                                                  | United Kingdom                                                                                                                                                                                                                                             |
|                                                           | Profile of the applicant                                                                                     | Vulnerability                                           | Laying down special reception conditions according to special needs of applicants  | Member States are required to assess whether a vulnerable person is an applicant with special needs                                                                                                             | Austria, Belgium, Cyprus, Czech Republic, Germany, Greece, Italy, Luxembourg, Netherlands, Poland, Slovak Republic, Spain, Sweden, United Kingdom, Norway                                                                                                  |
|                                                           |                                                                                                              | Medical/psychological needs                             |                                                                                    |                                                                                                                                                                                                                 | Austria, Belgium, Cyprus, Greece, Italy, Latvia, Poland, Spain, Sweden, Norway                                                                                                                                                                             |
|                                                           |                                                                                                              | Age/UAMs                                                |                                                                                    |                                                                                                                                                                                                                 | Austria, France, Hungary, Italy, Latvia, Poland) – specifically if the applicant is a UAM (Austria, Belgium, Cyprus, Czech Republic, Estonia, Finland, France, Greece, Hungary, Italy, Lithuania, Luxembourg, Netherlands, Slovak Republic, Sweden, Norway |
|                                                           |                                                                                                              | Gender                                                  |                                                                                    |                                                                                                                                                                                                                 | Austria, Belgium, Cyprus, France, Italy, Latvia, Poland, Spain, Sweden                                                                                                                                                                                     |
|                                                           |                                                                                                              | Family situation                                        |                                                                                    |                                                                                                                                                                                                                 | Austria, Belgium, France, Greece, Italy, Latvia, Luxembourg, Poland, Slovak Republic, Spain, Sweden                                                                                                                                                        |
|                                                           |                                                                                                              | Family ties                                             |                                                                                    |                                                                                                                                                                                                                 | Austria, Czech Republic, Slovak Republic, Spain                                                                                                                                                                                                            |
|                                                           |                                                                                                              | Nationality/ethnicity                                   |                                                                                    |                                                                                                                                                                                                                 | Austria, Cyprus, Luxembourg, United Kingdom, Norway                                                                                                                                                                                                        |
|                                                           |                                                                                                              | Language capabilities                                   |                                                                                    |                                                                                                                                                                                                                 | Belgium                                                                                                                                                                                                                                                    |
| Facilities                                                |                                                                                                              | Accommodation centers                                   |                                                                                    |                                                                                                                                                                                                                 | Open reception collective centers                                                                                                                                                                                                                          |

|                            |                                                                  |                                                                                      |                                                   |                                                                                                                                                              |                                                                                                                                                                                                                         |
|----------------------------|------------------------------------------------------------------|--------------------------------------------------------------------------------------|---------------------------------------------------|--------------------------------------------------------------------------------------------------------------------------------------------------------------|-------------------------------------------------------------------------------------------------------------------------------------------------------------------------------------------------------------------------|
|                            | Private facilities<br>Houses, Flats,<br>apartments and<br>hotels | Standard use of private houses or<br>flats (in addition to collective<br>facilities) | The accommodation is on<br>independent units      | The cost of accommodation is very high.<br>There is a need for prior agreements                                                                              | Austria, Belgium, Czech Republic, Finland, France, Italy, Hungary Luxembourg<br>(hotels inc.), Spain, Sweden, United Kingdom, Norway                                                                                    |
|                            |                                                                  | Private Hotels in emergencies                                                        |                                                   |                                                                                                                                                              | Austria, Belgium, Cyprus, Finland, France, Italy, Luxembourg, Sweden, United<br>Kingdom)                                                                                                                                |
|                            |                                                                  | Cash benefits or financial aids for<br>private accommodation                         |                                                   |                                                                                                                                                              | Austria, Poland, Slovenia                                                                                                                                                                                               |
|                            | Initial/transit                                                  | during admission procedures                                                          | Attention to urgent needs                         | Restriction of movement                                                                                                                                      | e.g., Austria, Germany, Netherlands, Portugal, Spain, Sweden                                                                                                                                                            |
|                            | Especial facilities<br>for vulnerable<br>persons                 | UAMs, singles with minors, ...                                                       | Special needs are dealt with in<br>a specific way | Need specialized personnel                                                                                                                                   | Austria, Belgium, Cyprus, Czech Republic, Estonia, Germany, Finland, France,<br>Hungary, Ireland, Italy, Lithuania, Luxembourg Netherlands, Poland, Portugal,<br>Slovak Republic, Spain, Sweden, United Kingdom, Norway |
|                            |                                                                  | Children with specific needs                                                         |                                                   |                                                                                                                                                              | Cyprus, Czech Republic, Finland, Italy, Poland, Sweden                                                                                                                                                                  |
|                            |                                                                  | Victims of trafficking in human<br>beings                                            |                                                   |                                                                                                                                                              | Belgium, Cyprus, Czech Republic, Estonia, Finland, Italy, Lithuania,<br>Luxembourg, Netherlands (including minors), United Kingdom, Norway                                                                              |
|                            |                                                                  | Persons with medical or<br>psychological needs                                       |                                                   |                                                                                                                                                              | Belgium, Cyprus, Czech Republic, Germany, Estonia, Finland, Italy, Latvia,<br>Luxembourg, Spain, Sweden, Norway;                                                                                                        |
|                            |                                                                  | Persons with higher security needs                                                   |                                                   |                                                                                                                                                              | Czech Republic, Estonia; Luxembourg, Norway.                                                                                                                                                                            |
| Authorities<br>responsible | Financial<br>responsibility                                      | Single State authority                                                               |                                                   | Coordination and cooperation is needed<br>(agreements, contracts, conventions,<br>networks, informal mechanism,<br>guidelines, plans and internal protocols) | Belgium, Estonia, Luxembourg,                                                                                                                                                                                           |
|                            |                                                                  | Shared responsibility between more<br>than one governmental<br>department/agency     |                                                   |                                                                                                                                                              | Cyprus, Czech Republic, France, Greece, Hungary, Ireland, Latvia, Lithuania,<br>Netherlands, Poland, Slovenia, Slovak Republic, Spain, Sweden, United<br>Kingdom, Norway                                                |
|                            |                                                                  | State and local authorities together                                                 |                                                   |                                                                                                                                                              | Austria, Finland, Italy (grants from national fund), Portugal                                                                                                                                                           |
|                            |                                                                  | Regional/local authorities                                                           |                                                   |                                                                                                                                                              | Germany (quota)                                                                                                                                                                                                         |
|                            | Executive<br>responsibility                                      | Full responsibility of State                                                         |                                                   |                                                                                                                                                              | Czech Republic, Finland, Greece, Hungary, Latvia, Lithuania, Netherlands,<br>Poland, Slovenia, Slovak Republic, Sweden (except UAMs)                                                                                    |
|                            |                                                                  | Responsibility shared between State<br>and Local authorities                         |                                                   |                                                                                                                                                              | Austria, Belgium, Cyprus, Italy, Portugal, France                                                                                                                                                                       |
|                            |                                                                  | Regional/local authorities                                                           |                                                   |                                                                                                                                                              | Germany                                                                                                                                                                                                                 |
|                            |                                                                  | Subcontracted service providers                                                      |                                                   |                                                                                                                                                              | Greece, Ireland, Italy, Poland, Spain, Sweden (to some extent), United Kingdom,<br>Norway                                                                                                                               |
|                            |                                                                  | NGOs and private sector companies                                                    |                                                   |                                                                                                                                                              | Austria, France, Estonia, Luxembourg                                                                                                                                                                                    |
|                            |                                                                  | NGOs                                                                                 |                                                   |                                                                                                                                                              | Belgium and Portugal                                                                                                                                                                                                    |
|                            |                                                                  | Local authorities and private<br>companies                                           |                                                   |                                                                                                                                                              | Cyprus                                                                                                                                                                                                                  |
|                            |                                                                  | Contracted service providers                                                         |                                                   |                                                                                                                                                              | Ireland                                                                                                                                                                                                                 |

**Table S2.** Strategies for increasing the capacity of reception.

| Strategy                         |                                                                             |                                                                                                                                                                   | Drivers                                                                                                                                                                       | Constraints                                                                                                                                                                                                             | Country                                                                                                                                                                     |
|----------------------------------|-----------------------------------------------------------------------------|-------------------------------------------------------------------------------------------------------------------------------------------------------------------|-------------------------------------------------------------------------------------------------------------------------------------------------------------------------------|-------------------------------------------------------------------------------------------------------------------------------------------------------------------------------------------------------------------------|-----------------------------------------------------------------------------------------------------------------------------------------------------------------------------|
| Emergency plans                  | Outlining what type of action will be undertaken by whom and to what effect | Identify responsible authorities and who is to coordinate these<br>Define the type and scope of activities, and of follow-up actions<br>Estimate costs.           | Often cover increasing capacity through existing or new facilities triggering the activation of other flexibility mechanisms                                                  | Action is required in advance                                                                                                                                                                                           | Austria, Czech Republic, Estonia, Finland, France, Hungary, Italy, Latvia, Lithuania, Netherlands, Poland, Slovak Republic, Slovenia, Spain, Sweden, and Norway             |
| Increase (decrease) Budget       |                                                                             | May consist of the internal reallocation or internal application for additional funds<br>May derive from the type of contracts established with service providers | Budgetary flexibility is key to financing other flexibility mechanisms, such as stimulating capacity in existing or new reception facilities or recruiting extra case workers | Can be very time consuming.<br>Requires a quick and appropriate response                                                                                                                                                | Austria, Belgium, Estonia, Finland, Greece, Hungary, Ireland, Italy, Latvia, Luxembourg, Netherlands, Poland, Slovak Republic, Slovenia, Sweden, United Kingdom and Norway) |
| “Buffer” capacity                | Existing facilities                                                         | Reserve % emergency places                                                                                                                                        | -Immediate accessibility<br>-Similar quality<br>-more sustainable (consequence)                                                                                               | Only small percentages are allowed                                                                                                                                                                                      | Finland, Ireland, Luxembourg, Netherlands, Slovak Republic and Norway                                                                                                       |
|                                  |                                                                             | Space in facilities with another use<br>Schools, training facilities;<br>Military barracks;<br>Reserve hospitals                                                  | Availability                                                                                                                                                                  | -Delays;<br>Agreements, conditioning spaces (time)<br>-Prevent the development of other activities (only empty buildings).<br>-Lower quality                                                                            | Austria, Belgium, Czech Republic, Netherlands, Poland, Slovak Republic and Slovenia                                                                                         |
|                                  |                                                                             | Hotels/apartments                                                                                                                                                 | Quick availability                                                                                                                                                            | High cost;<br>Coordination and market regulation tools need to be developed and implemented                                                                                                                             | Belgium, Estonia, France, Italy, Luxembourg, Netherlands, Portugal, Sweden                                                                                                  |
|                                  |                                                                             | Private external service                                                                                                                                          | Immediate accessibility                                                                                                                                                       | Adaptability to the demand                                                                                                                                                                                              | United Kingdom                                                                                                                                                              |
|                                  | New facilities                                                              | Build new facilities                                                                                                                                              | -Similar quality<br>-more sustainable (consequence)                                                                                                                           | High initial cost, time,                                                                                                                                                                                                | Austria, Belgium, Germany, Italy, Poland, Slovak Republic, Sweden                                                                                                           |
|                                  |                                                                             | Extend facilities                                                                                                                                                 | Similar level of quality as other places in that facility                                                                                                                     | Depending on the resources available                                                                                                                                                                                    |                                                                                                                                                                             |
| Special standards in emergencies | Special facilities                                                          | Hotels                                                                                                                                                            | Immediate accessibility                                                                                                                                                       | Sub-standard facilities. Only short periods, often longer. when material reception conditions are not available in a certain geographical area or when housing capacities normally available are temporarily exhausted, | Austria, Belgium, Czech Republic, Estonia, Hungary, Ireland, Italy, Latvia, Luxembourg, Netherlands, Poland, Slovenia, Sweden                                               |
|                                  |                                                                             | Emergency facilities                                                                                                                                              |                                                                                                                                                                               |                                                                                                                                                                                                                         |                                                                                                                                                                             |
|                                  |                                                                             | Camp grounds, holiday parks                                                                                                                                       |                                                                                                                                                                               |                                                                                                                                                                                                                         |                                                                                                                                                                             |
| Speeding up the procedure        | Additional workers                                                          | New employment                                                                                                                                                    | Accelerated procedures<br>Facilitating the outflow                                                                                                                            | Specific training is required for workers                                                                                                                                                                               | Belgium, Cyprus, Finland, France, Greece, Hungary, Latvia, Luxembourg, Netherlands, Poland, Portugal, Slovak Republic, Slovenia, Sweden, Norway                             |
|                                  |                                                                             | Reassign staff                                                                                                                                                    |                                                                                                                                                                               |                                                                                                                                                                                                                         | Ireland,                                                                                                                                                                    |
|                                  |                                                                             | Reserve officials                                                                                                                                                 |                                                                                                                                                                               |                                                                                                                                                                                                                         | Estonia and Latvia                                                                                                                                                          |
|                                  |                                                                             | Special units                                                                                                                                                     |                                                                                                                                                                               |                                                                                                                                                                                                                         | Sweden,                                                                                                                                                                     |
|                                  | Fast-tracking                                                               | Safe country applicants                                                                                                                                           |                                                                                                                                                                               |                                                                                                                                                                                                                         | Belgium, Finland, France and Luxembourg                                                                                                                                     |
|                                  |                                                                             | Suspected of fraud                                                                                                                                                |                                                                                                                                                                               |                                                                                                                                                                                                                         | France                                                                                                                                                                      |
|                                  |                                                                             | Danger to the public order                                                                                                                                        |                                                                                                                                                                               |                                                                                                                                                                                                                         | France                                                                                                                                                                      |
|                                  |                                                                             |                                                                                                                                                                   |                                                                                                                                                                               |                                                                                                                                                                                                                         |                                                                                                                                                                             |

|                                               |                                                         |                                            |                               |                                                                 |                                                                                                        |
|-----------------------------------------------|---------------------------------------------------------|--------------------------------------------|-------------------------------|-----------------------------------------------------------------|--------------------------------------------------------------------------------------------------------|
|                                               |                                                         | clearly does not meet the minimum criteria |                               |                                                                 | Luxembourg,                                                                                            |
| Early warning                                 | Monitoring system that monitors the inflow and/or stock | Software programs                          | The system is more efficient  | A constant monitoring is needed                                 | Austria, Czech Republic, Finland, Greece, Ireland, Italy, Netherlands, Slovenia, Spain, Sweden, Norway |
|                                               | Risk analyses, projections                              |                                            | Allows to forecast the demand | Medium/long-term                                                |                                                                                                        |
| Financial allowance for private accommodation |                                                         |                                            | Freedom to choose             | Assignments are below the market price. It creates competition, | Belgium, Cyprus, Italy, Poland                                                                         |
